# Supplementary material for: AlgaeTraits: a trait database for (European) seaweeds
Source: Copernicus journal article supplement (doi:10.5194/essd-15-2711-2023), 2023-07-04
Supplement: Supplementary file 1 [file essd-15-2711-2023-supplement.zip]

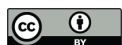

## *Supplement of*

# **AlgaeTraits: a trait database for (European) seaweeds**

**Sofie Vranken et al.**

*Correspondence to:* Sofie Vranken ([sofie.vranken@ugent.be](mailto:sofie.vranken@ugent.be)) and Olivier De Clerck ([olivier.declerck@ugent.be](mailto:olivier.declerck@ugent.be))

- [essd-15-2711-2023-supplement-title-page.pdf](#)
- [Survey\\_seaweed\\_traits\\_update06072015.xlsx](#)

The copyright of individual parts of the supplement might differ from the article licence.
